# Supplementary material
Source: PubMed Central journal article supplement (PMC6829036)
Supplement: NIHMS1047832-supplement-Supplemental_Material.pdf [file NIHMS1047832-supplement-Supplemental_Material.pdf]

## Inverse probability weighting

Data were weighted by inverse probability weighting (IPW) to adjust for selection bias due to non-response and censoring (i.e., eligibility to participate in the childhood questionnaire):  $1/(P_{\text{childhood}}) * 1/(P_{\text{censor}})$ . The following model was used for both outcomes, and both the individual weights and the combined weight were trimmed at the 99<sup>th</sup> percentile.

Outcome(logit)= white male education educ\_miss gen\_health gen\_health\_miss stroke stroke\_miss cog\_impaired cog\_imp\_miss urban\_resid urban\_resid\_miss smoker smoker\_miss income income\_miss simple7 simple7\_miss health\_insurance health\_insurance\_miss Kidney\_Failure Kidney\_Failure\_Miss MI MI\_Miss male\*gen\_health male\*stroke male\*cog\_impaired male\*urban\_resid male\*smoker male\*income male\*simple7 male\*health\_insurance male\*Kidney\_Failure male\*MI education\*stroke education\*cog\_impaired education\*urban\_resid education\*Kidney\_Failure gen\_health\*stroke gen\_health\*cog\_impaired gen\_health\*urban\_resid gen\_health\*income gen\_health\*simple7 gen\_health\*Kidney\_Failure gen\_health\*MI stroke\*cog\_impaired stroke\*urban\_resid stroke\*smoker stroke\*income stroke\*simple7 stroke\*Kidney\_Failure stroke\*MI cog\_impaired\*urban\_resid cog\_impaired\*smoker cog\_impaired\*income cog\_impaired\*simple7 cog\_impaired\*Kidney\_Failure cog\_impaired\*MI urban\_resid\*smoker urban\_resid\*income urban\_resid\*simple7 urban\_resid\*Kidney\_Failure urban\_resid\*MI smoker\*simple7 smoker\*Kidney\_Failure smoker\*MI income\*simple7income\*Kidney\_Failure income\*MI simple7\*health\_insurance simple7\*Kidney\_Failure simple7\*MI health\_insurance\*Kidney\_Failure Kidney\_Failure\*MI white\*male white\*education white\*gen\_health white\*stroke white\*cog\_impaired white\*urban\_resid white\*smoker white\*income white\*simple7 white\*health\_insurance white\*Kidney\_Failure white\*MI
